# Supplementary material
Source: MDPI journal article supplement (https://www.mdpi.com/2071-1050/15/23/16458)
Supplement: s1 [file s1]

# Supporting Information for

## Identification of the Pollution Mechanisms and Remediation Strategies for Abandoned Wells in the Karst Areas of Northern China

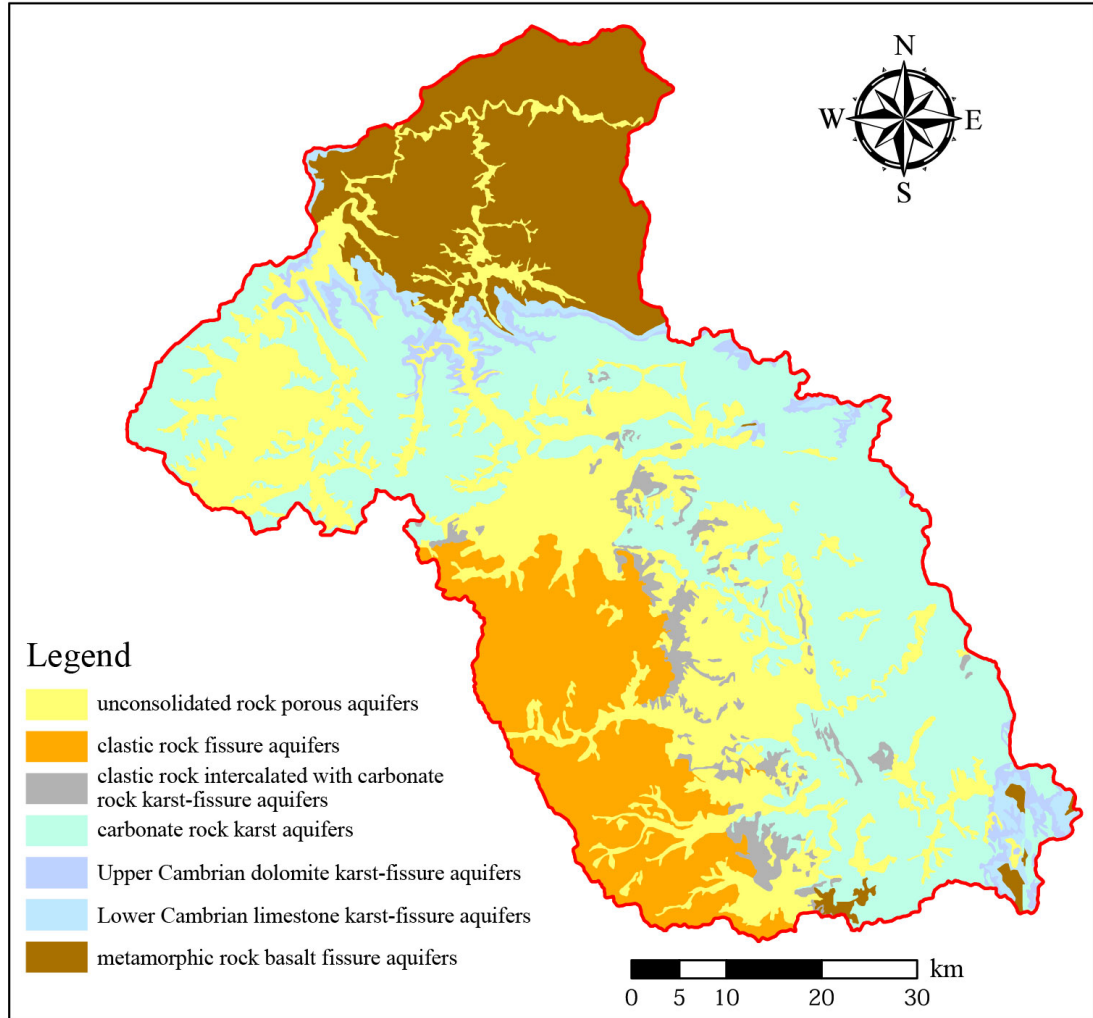

**Figure S1. Hydrogeological map of Yangquan City**

**Table S1. Abandoned well pollution risk comprehensive score**

| No. | Well no. | Well depth | Comprehensive score |
|-----|----------|------------|---------------------|
| 1   | YX01     | 787        | 4.2514              |
| 2   | YX02     | 153        | 3.7496              |
| 3   | YX03     | 738.5      | 3.5091              |
| 4   | YX04     | 86.5       | 3.4617              |
| 5   | YX05     | 400        | 2.8627              |
| 6   | YX06     | 146        | 2.6652              |
| 7   | YX07     | 152.6      | 3.9155              |
| 8   | YX08     | 138        | 3.9155              |

|    |      |        |        |
|----|------|--------|--------|
| 9  | YX09 | 98.6   | 2.7872 |
| 10 | YX10 | 126.66 | 2.9531 |
| 11 | YX11 | 66.64  | 2.7872 |
| 12 | YX12 | 157.42 | 2.9531 |
| 13 | YX13 | 150    | 2.9531 |
| 14 | YX14 | 77.13  | 2.9531 |
| 15 | YX15 | 745.5  | 4.4715 |
| 16 | YX16 | 531.6  | 3.0828 |
| 17 | YX17 | 563    | 4.0452 |
| 18 | YX18 | 596.23 | 4.0452 |
| 19 | YX19 | 591    | 4.0452 |
| 20 | YX20 | 200    | 3.8793 |
| 21 | YX21 | 685    | 3.5091 |
| 22 | YX22 | 537.6  | 3.0828 |
| 23 | YX23 | 655.69 | 4.1836 |
| 24 | YX24 | 800    | 4.4715 |
| 25 | YX25 | 700    | 3.5091 |
| 26 | YX26 | 150    | 2.7872 |
| 27 | YX27 | 300    | 2.6968 |
| 28 | YX28 | 100    | 0.3862 |
| 29 | YX29 | 100    | 0.5741 |
| 30 | YX30 | 80     | 0.3862 |
| 31 | YX31 | 80     | 0.3862 |
| 32 | YX32 | 80     | 0.3862 |
| 33 | YX33 | 120    | 0.5741 |
| 34 | YX34 | 100    | 0.3862 |
| 35 | YX35 | 100    | 0.3862 |
| 36 | YX36 | 100    | 0.3862 |
| 37 | YX37 | 100    | 0.5741 |
| 38 | YX38 | 170    | 0.3862 |
| 39 | YX39 | 90     | 0.5741 |
| 40 | YX40 | 636.76 | 3.289  |
| 41 | YX41 | 80     | 2.4993 |
| 42 | YX42 | 80     | 2.4993 |
| 43 | YX43 | 80     | 2.4993 |
| 44 | YX44 | 150    | 0.3862 |
| 45 | YX45 | 100    | 0.3862 |
| 46 | YX46 | 65     | 0.3862 |
| 47 | YX47 | 60     | 0.3862 |
| 48 | YX48 | 100    | 0.3862 |
| 49 | YX49 | 90     | 0.3862 |
| 50 | YX50 | 130    | 0.5741 |
| 51 | YX51 | 100    | 0.5741 |

|    |      |        |        |
|----|------|--------|--------|
| 52 | YX52 | 86     | 0.5741 |
| 53 | YX53 | 45     | 0.5741 |
| 54 | YX54 | 45     | 0.3862 |
| 55 | YX55 | 45     | 0.3862 |
| 56 | YX56 | 40     | 0.3862 |
| 57 | YX57 | 50     | 0.3862 |
| 58 | YX58 | 24     | 0.5741 |
| 59 | YX59 | 45     | 0.5741 |
| 60 | YX60 | 30     | 0.3862 |
| 61 | YX61 | 40     | 0.3862 |
| 62 | YX62 | 30     | 0.454  |
| 63 | YX63 | 30     | 0.454  |
| 64 | YX64 | 50     | 0.5741 |
| 65 | YX65 | 50     | 0.5741 |
| 66 | YX66 | 35     | 0.5741 |
| 67 | YX67 | 30     | 0.5741 |
| 68 | YX68 | 20     | 0.5741 |
| 69 | YX69 | 42     | 0.5741 |
| 70 | YX70 | 43     | 0.5741 |
| 71 | YX71 | 45     | 0.5741 |
| 72 | YX72 | 50     | 0.5741 |
| 73 | YX73 | 225    | 2.629  |
| 74 | YX74 | 760    | 3.5091 |
| 75 | YX75 | 700    | 3.5091 |
| 76 | YX76 | 80     | 0.5741 |
| 77 | YX77 | 120    | 0.5741 |
| 78 | YX78 | 610    | 3.2212 |
| 79 | YX79 | 502.6  | 3.1506 |
| 80 | YX80 | 600    | 4.4715 |
| 81 | PD01 | 336.11 | 1.6503 |
| 82 | PD02 | 540    | 1.6503 |
| 83 | PD03 | 450    | 1.6503 |
| 84 | PD04 | 495.06 | 2.7949 |
| 85 | PD05 | 48.96  | 2.5671 |
| 86 | PD06 | 166.52 | 2.5671 |
| 87 | PD07 | 851.83 | 3.289  |
| 88 | PD08 | 156.99 | 1.5206 |
| 89 | PD09 | 150.11 | 1.5206 |
| 90 | PD10 | 275    | 1.6503 |
| 91 | PD11 | 355.15 | 1.6503 |
| 92 | PD12 | 215    | 1.6503 |
| 93 | PD13 | 306    | 1.6503 |
| 94 | PD14 | 568.5  | 1.6503 |

|     |      |        |        |
|-----|------|--------|--------|
| 95  | PD15 | 251    | 1.6503 |
| 96  | PD16 | 85.16  | 1.5206 |
| 97  | PD17 | 150.14 | 1.5206 |
| 98  | PD18 | 321    | 1.6503 |
| 99  | PD19 | 230    | 1.6503 |
| 100 | PD20 | 350    | 1.6503 |
| 101 | PD21 | 280    | 1.6503 |
| 102 | PD22 | 250.01 | 1.6503 |
| 103 | PD23 | 452    | 1.6503 |
| 104 | PD24 | 270.52 | 1.6503 |
| 105 | KQ01 | 500    | 2.7949 |
| 106 | KQ02 | 490.15 | 3.7573 |
| 107 | KQ03 | 480.5  | 2.7949 |
| 108 | KQ04 | 480.17 | 2.7949 |
| 109 | KQ05 | 440.36 | 2.7949 |
| 110 | KQ06 | 450.2  | 2.7949 |
| 111 | KQ07 | 450.05 | 2.7949 |
| 112 | KQ08 | 450.71 | 2.7949 |
| 113 | KQ09 | 480.29 | 2.7949 |
| 114 | KQ10 | 490.38 | 2.7949 |
| 115 | KQ11 | 480.11 | 2.7949 |
| 116 | KQ12 | 490.59 | 2.7949 |
| 117 | KQ13 | 490.04 | 2.7949 |
| 118 | KQ14 | 490.59 | 2.7949 |
| 119 | KQ15 | 486.82 | 2.7949 |
| 120 | KQ16 | 760    | 4.1836 |
| 121 | KQ17 | 756    | 4.1836 |
| 122 | KQ18 | 260    | 2.6968 |
| 123 | CQ01 | 200    | 3.6592 |
| 124 | CQ02 | 200    | 2.629  |
| 125 | CQ03 | 574.8  | 2.7949 |
| 126 | CQ04 | 397    | 2.7949 |
| 127 | CQ05 | 500    | 2.7949 |
| 128 | CQ06 | 489    | 2.7949 |
| 129 | CQ07 | 506    | 2.7949 |
| 130 | CQ08 | 420    | 3.0828 |
| 131 | CQ09 | 580    | 3.0828 |
| 132 | CQ10 | 400    | 4.0452 |
| 133 | JQ01 | 500    | 3.8251 |
| 134 | JQ02 | 650.98 | 4.1836 |
| 135 | JQ03 | 500    | 2.8627 |
| 136 | JQ04 | 800    | 3.5091 |
| 137 | JQ05 | 40     | 0.6419 |

In Table S1, it is observed that certain abandoned wells exhibit identical comprehensive scores. This phenomenon can be attributed to the relative spatial clustering of these wells. Additionally, the environmental factors contributing to pollution risk, including the conditions of nearby pollution sources and the inherent characteristics of the abandoned wells, are homogenous.

Taking the criterion layer as an example, the Python code for calculating the pairwise comparison matrix weights is as follows:

```
import numpy as np
from numpy.linalg import eig
def ahp(matrix):
    # Step 1: Eigenvalue and Eigenvector Calculation
    eigenvalue, eigenvector = np.linalg.eig(matrix)
    max_eigenvalue = np.max(np.real(eigenvalue))
    # Step 2: Consistency Index (CI) Calculation
    n = len(matrix)
    CI = (max_eigenvalue - n) / (n - 1)
    # Step 3: Consistency Ratio (CR) Calculation
    # Random Index (RI) is assumed based on matrix size
    RI_values = {1: 0, 2: 0, 3: 0.58, 4: 0.89, 5: 1.12, 6: 1.26, 7: 1.36, 8: 1.41, 9: 1.46}
    RI = RI_values.get(n, 1.46) # default to 1.46 for n > 9
    CR = CI / RI
    # Step 4: Normalized Eigenvector as Weights
    weight = np.real(eigenvector[:, np.argmax(np.real(eigenvalue))])
    weight_normalized = weight / np.sum(weight)
    return max_eigenvalue, CI, CR, weight_normalized
# Example usage
matrix = np.array([[1, 1/3, 1/3, 1/4, 1/5],
                   [3, 1, 1, 1/2, 1/3],
                   [3, 1, 1, 1/2, 1/3],
                   [4, 2, 2, 1, 2/3],
```

$[5, 3, 3, 3/2, 1])$

*max\_eigenvalue, CI, CR, weight\_normalized = ahp(matrix)*

*print("Max Eigenvalue:", "{:.4f}".format(max\_eigenvalue))*

*print("Consistency Index (CI):", "{:.4f}".format(CI))*

*print("Consistency Ratio (CR):", "{:.4f}".format(CR))*

*print("Normalized Weights:", ["{:.4f}".format(w) for w in weight\_normalized])*
